# Supplementary material
Source: PubMed Central journal article supplement (PMC4948015)

# Discovery of MK-8718, an HIV Protease Inhibitor Containing a Novel Morpholine Aspartate Binding Group

Christopher J. Bungard,<sup>\*a</sup> Peter D. Williams,<sup>a</sup> Jeanine E. Ballard,<sup>a</sup> David J. Bennett,<sup>a</sup> Christian Beaulieu,<sup>b</sup> Carolyn Bahnck-Teets,<sup>a</sup> Steve S. Carroll,<sup>a</sup> Ronald K. Chang,<sup>a</sup> David C. Dubost,<sup>a</sup> John F. Fay,<sup>a</sup> Tracy L. Diamond,<sup>a</sup> Thomas J. Greshock,<sup>a</sup> Li Hao, M. Katharine Holloway,<sup>a</sup> Peter J. Felock, Jennifer J. Gesell,<sup>a</sup> Hua-Poo Su,<sup>a</sup> Jesse J. Manikowski,<sup>a</sup> Daniel J. McKay,<sup>b</sup> Mike Miller,<sup>a</sup> Xu Min,<sup>a</sup> Carmela Molinaro,<sup>a</sup> Oscar M. Moradei,<sup>b</sup> Philippe G. Nantermet,<sup>a</sup> Christian Nadeau,<sup>b</sup> Rosa I. Sanchez,<sup>a</sup> Tummanapalli Satyanarayana,<sup>c</sup> William D. Shipe,<sup>a</sup> Sanjay K. Singh,<sup>c</sup> Vouy L. Truong,<sup>b</sup> Sivalenka Vijayasradhi,<sup>c</sup> Catherine M. Wiscount,<sup>a</sup> Joseph P. Vacca,<sup>b</sup> Sheldon N. Crane,<sup>b</sup> and John A. McCauley.<sup>a</sup>

<sup>a</sup>Merck Research Laboratories, 770 Sumneytown Pike, PO Box 4, West Point, PA 19486, USA

<sup>b</sup>Merck Frosst Centre for Therapeutic Research, 16711 TransCanada Highway, Kirkland, Quebec, Canada, H9H 3L1

<sup>c</sup>Albany Molecular Research Singapore Research Center, 61 Science Park Road #05-01, The Galen Singapore Science Park II, Singapore 117525

## Corresponding Author

\* E-mail: christopher\_bungard@merck.com

Phone: 215-652-5002

## Assay Protocols

### Assay for Inhibition of Microbial Expressed HIV Protease

Studies of the inhibition of the wildtype HIV-1 protease (which was expressed in *Escherichia coli*) were carried out with a peptide substrate [Val-Ser-Gln-Asn-( $\beta$ naphtyl)Ala-Pro-Ile-Val (SEQ ID NO 1)]. The inhibitor was first preincubated with the HIV-1 protease (wild type) enzyme in assay buffer (50 mM sodium acetate, pH 5.5, 100 mM NaCl, and 0.1% BSA) for 30 minutes at room temperature. Substrate was added to 400 micromolar in a total volume of 20 microliters containing 20 picomolar HIV-1 protease (final) and the reaction is incubated for 1 hour at 30°C. The reaction was quenched with the addition of formic acid and indinavir to 0.012% and 150 nM final concentrations, respectively. Product formation was determined after separation of product and substrate on a Zorbax Eclipse XDB-C18 column connected to an API 4000 mass spectrometer (Applied Biosystems) with multiple reaction monitoring (transitions were 644.5/428.9 and 615.4/422.2 (M1/M3) for product and indinavir

respectively). The extent of inhibition of the reaction was determined from the peak area of the products. Analysis of the products, independently synthesized, provided quantitation standards and confirmation of the product composition. Representative compounds of the present invention exhibit inhibition of HIV-1 protease in this assay.

#### Antiviral Assays in Cell Culture

Antiviral potency in a multiple round HIV-1 infection assay was carried out as follows. The assay was performed using MT-4 human T-lymphoid cells. MT-4 cells ( $2.5 \times 10^5$  cells per ml) were infected at a multiplicity of infection of  $\leq 0.01$  and incubated overnight in RPMI 1640 culture medium containing 10% fetal bovine serum. The infected cells were then washed twice in fresh culture medium and resuspended in RPMI 1640 containing 50% normal human serum at  $4 \times 10^5$  cells/ml and seeded into 384-well cell culture plates at 12,000 cells per well. Serial 1:2 dilutions of the test compounds were added to the wells. The test cultures were incubated for an additional 72 h at 37°C at which time virus levels were assayed.  $IC_{95}$  values were determined by non-linear 4-parameter curve fitting.

#### Synthesis of 9b – 9j

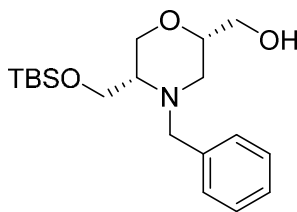

#### **((2S,5S)-4-Benzyl-5-(((tert-butyldimethylsilyl)oxy)methyl)morpholin-2-yl)methanol (11).**

Lithium perchlorate (18.3 g, 172 mmol) was added portionwise (caution exotherm!) to a solution of (S)-2-(benzylamino)-3-(((tert-butyldimethylsilyl)oxy)propan-1-ol (39.0 g, 132 mmol) and (R)-(-)-epichlorohydrin (15.9 g, 172 mmol) in toluene (400 ml) at ambient temperature. The resulting reaction was stirred at ambient temperature for 48 h. MeOH (100 ml) was added followed by slow addition of NaOMe (4M, 83mL) in MeOH. The resulting reaction was stirred at ambient temperature for 48 h. The reaction was quenched with sat. aq.  $NH_4Cl$ , and the crude product was extracted with EtOAc (x3). The combined organic fractions washed with brine, dried

over  $\text{MgSO}_4$ , and concentrated *in vacuo*. Purification on silica gel, eluting with a gradient of 10 to 50 % EtOAc in hexanes, afforded the title compound (25 g, 54 %) as a colorless gum.  $^1\text{H NMR}$  (400 MHz, Acetone- $d_6$ )  $\delta$  7.39 (d,  $J$  = 7.1 Hz, 2H), 7.36 – 7.29 (m, 2H), 7.28 – 7.20 (m, 1H), 4.03 – 3.95 (m, 3H), 3.92 (d,  $J$  = 13.7 Hz, 1H), 3.78 (d,  $J$  = 13.7 Hz, 1H), 3.65 (dd,  $J$  = 2.8, 11.0 Hz, 1H), 3.61 – 3.51 (m, 3H), 3.50 – 3.40 (m, 1H), 2.73 – 2.64 (m, 1H), 2.55 – 2.48 (m, 2H), 0.91 (s, 9H), 0.09 (s, 3H), 0.07 (s, 3H); MS (ESI):  $m/z$  = 352.1 ( $\text{MH}^+$ ).

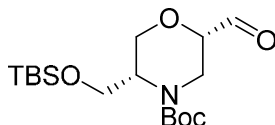

**tert-Butyl (2S,5S)-5-(((tert-butyldimethylsilyl)oxy)methyl)-2-formylmorpholine-4-carboxylate (12).**

((2S,5S)-4-Benzyl-5-(((tert-butyldimethylsilyl)oxy)methyl)morpholin-2-yl)methanol (**11**) (50 g, 142 mmol),  $\text{Boc}_2\text{O}$  (40 ml, 171 mmol),  $\text{NEt}_3$  (20 ml, 142 mmol) and  $\text{PdOH}_2$  (20 g, 28.4 mmol) were suspended in Ethanol (500 ml) under nitrogen in a Parr shaker apparatus. The reaction was evacuated and backfilled with hydrogen gas (x 3) and shaken overnight at 45 psi hydrogen. The reaction was evacuated and backfilled with nitrogen (x 3) and the resulting suspension filtered through Solka-Floc<sup>®</sup>. The filtrate was diluted with EtOAc and the solution washed with water (x 3), then dried over  $\text{Na}_2\text{SO}_4$  and concentrated *in vacuo*. Purification on silica gel, eluting with a gradient of 5 to 40 % EtOAc in hexanes, afforded the tert-butyl (2S,5S)-5-(((tert-butyldimethylsilyl)oxy)methyl)-2-(hydroxymethyl)morpholine-4-carboxylate (51 g) as a colorless gum. DMSO (22 ml, 312 mmol) was dissolved in  $\text{CH}_2\text{Cl}_2$  (360 ml) and the resulting solution cooled to  $-78^\circ\text{C}$ . Oxalyl chloride (21 ml, 241 mmol) was added dropwise at a rate so as the internal temperature did not exceed  $-55^\circ\text{C}$ . The resulting reaction was stirred at  $-78^\circ\text{C}$  for 30 min. tert-Butyl (2S,5S)-5-(((tert-butyldimethylsilyl)oxy)methyl)-2-(hydroxymethyl)morpholine-4-carboxylate (51 g, 142 mmol) was dissolved in  $\text{CH}_2\text{Cl}_2$  (154 ml) and added dropwise at a rate so as the internal temperature did not exceed  $-60^\circ\text{C}$ . The resulting reaction was stirred at  $-78^\circ\text{C}$  for 30 min, then a further 1 h between  $-60$  and  $-45^\circ\text{C}$ . The reaction was cooled to  $-78^\circ\text{C}$  and  $\text{NEt}_3$  (99 ml, 709 mmol) was added dropwise at a rate so as the internal temperature did not exceed  $-60^\circ\text{C}$ . The resulting reaction was warmed directly to  $0^\circ\text{C}$  and stirred for 1 h. The reaction was quenched with water and the crude product was extracted with  $\text{CH}_2\text{Cl}_2$  (x3). The combined organic fractions washed with water, brine, dried over  $\text{Na}_2\text{SO}_4$ , and concentrated *in vacuo* to afford crude title compound,

tert-butyl (2*S*,5*S*)-5-(((tert-butyl dimethylsilyl)oxy)methyl)-2-formylmorpholine-4-carboxylate (51 g, 100 %) which was used directly without further purification.

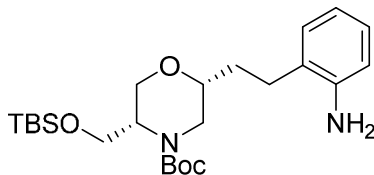

**tert-Butyl (2*R*,5*S*)-2-(2-aminophenyl)-5-(((tert-butyl dimethylsilyl)oxy)methyl)morpholine-4-carboxylate (13).**

(2-Nitrobenzyl)triphenylphosphonium bromide monohydrate (77 g, 156 mmol), K<sub>2</sub>CO<sub>3</sub> (39.2 g, 284 mmol) and 18-crown-6 (3.75 g, 14.19 mmol) were combined in DME (500 ml) and the reaction stirred at ambient temperature for 5 min. A solution of tert-butyl (2*S*,5*S*)-5-(((tert-butyl dimethylsilyl)oxy)methyl)-2-formylmorpholine-4-carboxylate (**12**) (51 g, 142 mmol) in DME (500 ml) was added and the resulting reaction stirred overnight at ambient temperature. The resulting suspension was filtered through solka-floc® and the filtrate concentrated *in vacuo*. Purification on silica gel, eluting with a gradient of 10 to 30 % EtOAc in hexanes, afforded tert-butyl (2*R*,5*S*)-5-(((tert-butyl dimethylsilyl)oxy)methyl)-2-((*E* and *Z*)-2-nitrostyryl)morpholine-4-carboxylate (63 g, 92 %) (mixture of *E* and *Z* isomers) as a colorless gum. MS (ESI): *m/z* = 501.4 (M+Na). The mixture of olefin isomers (63g) was dissolved in nitrogen degassed EtOH and added to a suspension of 10 % Pd/C (11 g) in EtOH, total EtOH (1000 ml). The reaction was evacuated and backfilled with hydrogen and shaken at 50 psi on a Parr reactor overnight. The reaction was evacuated and backfilled with nitrogen, filtered through a solka-floc®, and concentrated *in vacuo* to afford the title compound (57 g, 97 %) as a colorless gum. <sup>1</sup>H NMR (500 MHz, Acetone-d<sub>6</sub>) δ 6.99 (d, *J* = 7.3 Hz, 1H), 6.94 (t, *J* = 7.7 Hz, 1H), 6.70 (d, *J* = 7.9 Hz, 1H), 6.58 (t, *J* = 7.4 Hz, 1H), 4.46 (s, 1H), 4.11 (t, *J* = 11.7 Hz, 1H), 3.98 - 3.70 (m, 4H), 3.68 - 3.60 (m, 1H), 3.53 (dd, *J* = 11.6, 2.9 Hz, 1H), 3.37 - 3.27 (m, 1H), 2.85 - 2.57 (m, 3H), 1.79 - 1.69 (m, 2H), 1.45 (s, 9H), 0.94 (s, 9H), 0.17 - 0.10 (m, 6H); MS (ESI): *m/z* = 473.2 (M+Na).

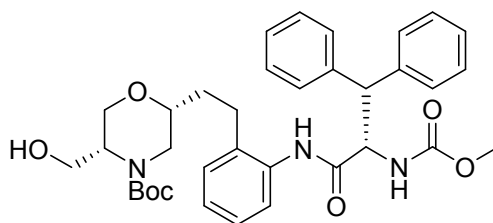

**tert-Butyl (2R,5R)-5-((hydroxymethyl)-2-((S)-2-((methoxycarbonyl)amino)-3,3-diphenylpropanamido)phenethyl)morpholine-4-carboxylate (15).**

2,6-Lutidine was added to a solution of tert-Butyl (2R,5S)-2-(2-aminophenethyl)-5-(((tert-butyl)dimethylsilyl)oxy)methyl)morpholine-4-carboxylate (**13**) (4.59 g, 10.2 mmol), HATU® (5.42 g, 14.3 mmol), and (S)-2-((methoxycarbonyl)amino)-3,3-diphenylpropanoic acid (3.66 g, 12.2 mmol) in DMF (70 ml) at ambient temperature and the resulting reaction stirred at this temperature overnight. The reaction was quenched with sat. aq. NaHCO<sub>3</sub>, and the crude product was extracted with EtOAc (x3). The combined organic fractions washed with 1M HCl, brine, dried over MgSO<sub>4</sub>, and concentrated *in vacuo*. Purification on silica gel, eluting with a gradient of 0 to 50 % EtOAc in hexanes, afforded tert-butyl (2R,5S)-5-(((tert-butyl)dimethylsilyl)oxy)methyl)-2-(2-((S)-2-((methoxycarbonyl)amino)-3,3-diphenylpropanamido)phenethyl)morpholine-4-carboxylate (3.95 g, 53%). MS (ESI): *m/z* = 632.2 (M+2H-Boc). The TBS ether (1.10 g, 1.50 mmol) was dissolved in THF (8 ml) and a 1M solution of TBAF in THF (3 ml) was added dropwise at ambient temperature and the reaction stirred for 1 hour. The reaction was quenched with water, and the crude product was extracted with EtOAc (x3). The combined organic fractions washed with brine, dried over MgSO<sub>4</sub>, and concentrated *in vacuo*. Purification on silica gel, eluting with a gradient of 10 to 100 % EtOAc in hexanes, afforded the title compound (0.780 g, 84 %). <sup>1</sup>H NMR (500 MHz, Chloroform-d) δ 8.19 - 8.00 (m, 1H), 7.70 - 7.60 (m, 1H), 7.40 - 7.04 (m, 12H), 5.37 - 5.21 (m, 1H), 5.10 - 4.95 (m, 1H), 4.71 - 4.54 (m, 1H), 4.25 - 4.05 (m, 1H), 4.00 - 3.50 (m, 6H), 3.12 - 2.99 (m, 1H), 2.67 - 2.90 (m, 1H), 2.46 - 2.82 (m, 1H), 2.26 - 2.10 (m, 1H), 1.69 - 1.51 (m, 3H), 1.47 (s, 9H).

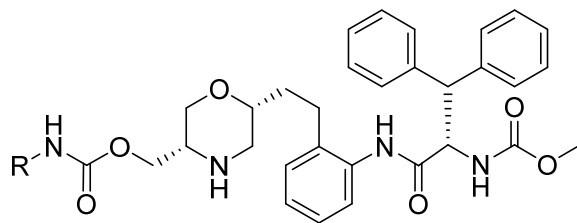

**General procedure for the preparation of amines 9b-9j in Table 1.**

tert-Butyl (2R,5R)-5-(hydroxymethyl)-2-((S)-2-((methoxycarbonyl)amino)-3,3-diphenylpropanamido)phenethyl)morpholine-4-carboxylate (**15**) (1 eq.) and CDI (2.05 eq) were dissolved in dry Pyridine (0.04 M) and the resulting solution heated at 50 °C for 30 min. The appropriate amine (6 eq.) was added and the resulting reaction heated at 50°C overnight. The mixture was diluted with EtOAc, washed with 5% aq.  $\text{KHSO}_4$ , sat.  $\text{NaHCO}_3$ , dried over  $\text{Na}_2\text{SO}_4$ , filtered and concentrated. The residues were purified on silica gel eluting with a gradient of 0 to 5% MeOH in DCM. The resulting Boc-protected Morpholines were deprotected by stirring with a 1:1 mixture of DCM:TFA at ambient temperature for 1 hour. The reaction mixtures were concentrated *in vacuo* then co-evaporated with heptane (x2) and triturated with ether to afford the products shown in table 1 as TFA salts. Alternatively the TFA salt could be neutralized with sat. aq.  $\text{NaHCO}_3$ , extracted with EtOAc, dried over  $\text{MgSO}_4$ , concentrated *in vacuo* then purified on silica gel eluting with a gradient of 0 to 5% MeOH in DCM to afford the products shown in table 1.

**Table 1.** Amine coupling partners and MS data for 9b – 9j.

| Amine                                                                               | Product | MS (ESI)<br>(MH <sup>+</sup> ) |
|-------------------------------------------------------------------------------------|---------|--------------------------------|
| 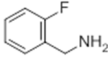   | 9b      | 669.3                          |
|    | 9c      | 669.3                          |
|    | 9d      | 686.2/688.2                    |
|    | 9e      | 691.2/693.2                    |
|    | 9f      | 677.2                          |
|   | 9g      | 677.2                          |
|  | 9h      | 603.4                          |
|  | 9i      | 643.4                          |
|  | 9j      | 561.0                          |

### Synthesis of MK-8718

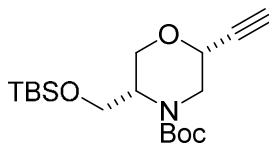

#### **tert-Butyl (2R,5S)-5-(((tert-butyldimethylsilyl)oxy)methyl)-2-ethynylmorpholine-4-carboxylate (19).**

Dimethyl (1-diazo-2-oxopropyl)phosphonate (3.90 ml, 26.0 mmol) was added to tert-butyl (2S,5S)-5-(((tert-butyldimethylsilyl)oxy)methyl)-2-formylmorpholine-4-carboxylate (**12**) (7.78 g, 21.6 mmol) and  $K_2CO_3$  (5.98 g, 43.3 mmol) in anhydrous MeOH (216 ml) at ambient temperature. The resulting reaction was stirred for 2 h at ambient temperature, then filtered and the MeOH removed *in vacuo*. Sat. aq.  $KH_2PO_4$  was added and the mixture was extracted with EtOAc (x 3). The combined organic fractions were dried over  $MgSO_4$  and concentrated *in vacuo*. Purification on silica gel, eluting with a gradient of 0 to 30 % EtOAc in hexanes, afforded the title compound (4.6 g, 60 %) as a colorless gum.  $^1H$  NMR (500 MHz, DMSO- $d_6$ )  $\delta$  4.16 (d, J = 10.9 Hz, 1H), 3.85 (d, J = 11.8 Hz, 1H), 3.90 – 3.67 (m, 3H), 3.60 – 3.45 (m, 3H), 3.02 – 2.78 (br m, 1H), 1.40 (s, 9H), 0.87 (s, 9H), 0.05 (s, 6H); MS (ESI):  $m/z$  = 256.01 (M+H-Boc).

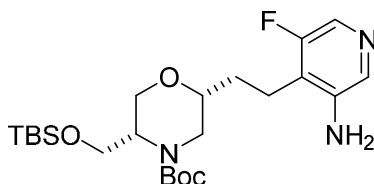

#### **tert-Butyl (2R,5S)-2-(2-(3-amino-5-fluoropyridin-4-yl)ethyl)-5-(((tert-butyldimethylsilyl)oxy)methyl)morpholine-4-carboxylate (21).**

tert-Butyl (2R,5S)-5-(((tert-butyldimethylsilyl)oxy)methyl)-2-ethynylmorpholine-4-carboxylate (**19**) (6.80 g, 19.1 mmol), 5-fluoro-4-iodopyridin-3-amine (4.55 g, 19.1 mmol),  $(PPh_3)_2PdCl_2$  (0.940 g, 1.34 mmol),  $NEt_3$  (80 ml, 574 mmol), and CuI (0.364 g, 1.91 mmol) were heated at 70 °C overnight. The reaction was quenched with sat. aq.  $KH_2PO_4$ , and the crude product was extracted with EtOAc (x3). The combined organic fractions were dried over  $MgSO_4$ , and concentrated *in vacuo*. Purification on silica gel, eluting with a gradient of 0 to 100 % EtOAc in hexanes, afforded tert-butyl (2R,5S)-2-((3-amino-5-fluoropyridin-4-yl)ethynyl)-5-(((tert-butyldimethylsilyl)oxy)methyl)morpholine-4-carboxylate (6.5 g) as a viscous oil contaminated with 5-fluoro-4-iodopyridin-3-amine. The impure material was taken into the next reaction as follows.  $PtO_2$  (1.58 g, 6.96 mmol)



was suspended in nitrogen degassed trifluoroethanol and tert-butyl (2R,5S)-2-((3-amino-5-fluoropyridin-4-yl)ethynyl)-5-(((tert-butyldimethylsilyl)oxy)methyl)morpholine-4-carboxylate (6.5 g, 14 mmol) (~50% pure) was dissolved in nitrogen degassed trifluoroethanol and added to the suspension of PtO<sub>2</sub>, total trifluoroethanol 280 ml. The reaction was evacuated and backfilled with hydrogen and shaken on the a Parr at 50 psi hydrogen for 48 h. The reaction was degassed with nitrogen, filtered through celite and the solvent removed *in vacuo*. Purification on silica gel, eluting with a gradient of 0 to 100 % EtOAc in hexanes, afforded the title compound (2.1 g, 24 %) as a white solid. <sup>1</sup>H NMR (500 MHz, DMSO-d<sub>6</sub>) δ 7.79 (s, 1H), 7.63 (s, 1H), 5.46 (s, 2H), 3.92 (d, J = 11.7 Hz, 1H), 3.85 – 3.67 (m, 3H), 3.56 – 3.50 (m, 1H), 3.44 (dd, J = 2.8, 11.7 Hz, 1H), 3.32 (s, 1H), 3.30 – 3.19 (br m, 1H), 2.73 – 2.54 (m, 2H), 1.63 – 1.47 (m, 2H), 1.40 (s, 9H), 0.87 (s, 9H), 0.06 (s, 6H); MS (ESI): *m/z* = 470.5 (MH<sup>+</sup>), 97% pure by LCMS.

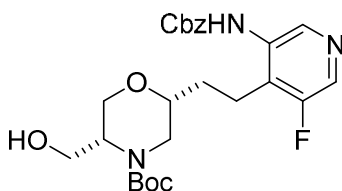

**tert-Butyl (2R,5R)-2-(2-(3-(((benzyloxy)carbonyl)amino)-5-fluoropyridin-4-yl)ethyl)-5-(hydroxymethyl)morpholine-4-carboxylate (23)**

Cbz-Cl (806 μl, 5.64 mmol) was added dropwise to a solution of tert-butyl (2R,5S)-2-(2-(3-amino-5-fluoropyridin-4-yl)ethyl)-5-(((tert-butyldimethylsilyl)oxy)methyl)morpholine-4-carboxylate (21) (1.0 g, 2.13 mmol) in pyridine (5 ml) at 0 °C. The reaction was allowed to warm slowly to ambient temperature overnight. The reaction was quenched with water and the crude product was extracted with CH<sub>2</sub>Cl<sub>2</sub> (x3). The combined organic fractions were washed with brine, dried over Na<sub>2</sub>SO<sub>4</sub>, and concentrated *in vacuo*. The crude residue was dissolved in THF (7 ml) and 1M TBAF (4.26 ml, 4.26 mmol) in THF was added dropwise at ambient temperature. The resulting reaction was stirred at this temperature for 2 h. The solution was diluted with EtOAc then washed with water and brine dried over MgSO<sub>4</sub>, and concentrated *in vacuo*. Purification on silica gel, eluting with a gradient of 0 to 100 % A to B (A = CHCl<sub>3</sub>, B = 7:2:1 CHCl<sub>3</sub>:EtOAc:MeOH) afforded the title compound (615 mg, 59 %) as a glassy solid. <sup>1</sup>H NMR (399 MHz, Chloroform-d) δ 9.05 (s, 1H), 8.18 (s, 1H), 8.03 (s, 1H), 7.47 – 7.31 (m, 5H), 5.28 – 5.16 (m, 2H), 4.06 – 3.60 (m, 5H), 3.52 (dd, J = 3.5, 11.9 Hz, 1H), 3.22 – 3.10 (m, 1H), 2.88 – 2.63 (m, 3H), 1.91 – 1.64 (m, 2H), 1.44 (s, 9H); MS (ESI): *m/z* = 490.6 (MH<sup>+</sup>), 82% pure by LCMS.

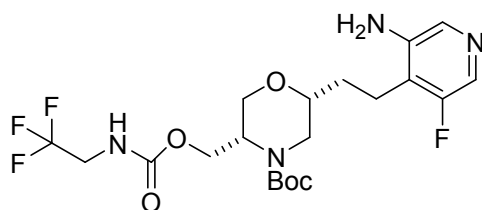

**tert-Butyl (2R,5S)-2-(2-(3-amino-5-fluoropyridin-4-yl)ethyl)-5-(((2,2,2-trifluoroethyl)carbamoyl)oxy)methyl)morpholine-4-carboxylate (25)**

A solution of tert-butyl (2R,5R)-2-(2-(3-(((benzyloxy)carbonyl)amino)-5-fluoropyridin-4-yl)ethyl)-5-(hydroxymethyl)morpholine-4-carboxylate (23) (652 mg, 1.33 mmol) and CDI (270 mg, 1.67 mmol) in pyridine (7 ml) was heated at 60 °C for 90 min. 2,2,2-Trifluoroethylamine (2.09 ml, 26.6 mmol) was added and the reaction heated at 60 °C overnight. The solution was diluted with EtOAc then washed with water and brine, then dried over MgSO<sub>4</sub> and concentrated *in vacuo*. Purification on silica gel, eluting with a gradient of 0 to 60 % EtOAc in hexanes, afforded 402 mg of tert-butyl (2R,5S)-2-(2-(3-(((benzyloxy)carbonyl)amino)-5-fluoropyridin-4-yl)ethyl)-5-(((2,2,2-trifluoroethyl)carbamoyl)oxy)methyl)morpholine-4-carboxylate. This material was dissolved in nitrogen degassed EtOH and added to a suspension of 10 % Pd/C (60mg) in EtOH, total EtOH (10 ml). The reaction was evacuated and backfilled with hydrogen and stirred overnight under a balloon of hydrogen. The reaction was evacuated and backfilled with nitrogen and filtered through a pad of celite. The solvent was removed *in vacuo* to afford the title compound (286 mg, 45%) as a foam. <sup>1</sup>H NMR (399 MHz, Chloroform-d)  $\delta$  7.86 (d, J = 2.4 Hz, 1H), 7.84 (s, 1H), 5.18 – 5.00 (m, 1H), 4.45 – 3.58 (m, 11H), 3.33 – 3.20 (m, 1H), 2.89 – 2.62 (m, 2H), 1.79 – 1.67 (m, 2H), 1.44 (s, 9H); MS (ESI): *m/z* = 481.6 (MH<sup>+</sup>), 76% pure by LCMS.

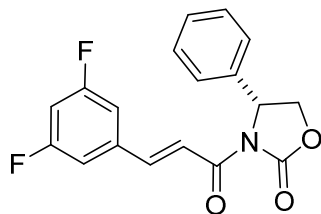

**(R,E)-3-(3-(3,5-Difluorophenyl)acryloyl)-4-phenyloxazolidin-2-one (32)**

A 2.5M solution of <sup>n</sup>BuLi in hexanes (28.6 ml, 71.5 mmol) was added dropwise to a solution of (R)-4-phenyloxazolidin-2-one (11.7 g, 71.5 mmol) in THF (400 ml) at -10 °C and the resulting solution stirred at this temperature for 10 min. A solution of (E)-3-(3,5-difluorophenyl)acryloyl chloride (14.5 g, 71.5 mmol) in THF (100 ml) was added dropwise and the resulting reaction stirred at 0 °C for 30 min. The reaction was quenched with 20% aq. NH<sub>4</sub>Cl, and the crude product was extracted with EtOAc (x3). The combined organic fractions washed with water, sat. aq. NaHCO<sub>3</sub> and brine, dried over MgSO<sub>4</sub>, and concentrated *in vacuo*. Purification on silica gel, eluting with a gradient of 0 to 50 % A to B (A = 1:1 hexanes:CHCl<sub>3</sub>, B = EtOAc) afforded the title compound (20 g, 86 %) as a solid. <sup>1</sup>H NMR (399 MHz, Chloroform-d) δ 7.91 (d, J = 15.7 Hz, 1H), 7.64 (d, J = 15.7 Hz, 1H), 7.46-7.32 (m, 5H), 7.15 - 7.03 (m, 2H), 6.84 (tt, J = 2.3, 8.7 Hz, 1H), 5.55 (dd, J = 3.9, 8.7 Hz, 1H), 4.76 (t, J = 8.8 Hz, 1H), 4.35 (dd, J = 3.9, 8.9 Hz, 1H); MS (ESI): *m/z* = 330.3 (MH<sup>+</sup>), 96% pure by LCMS.

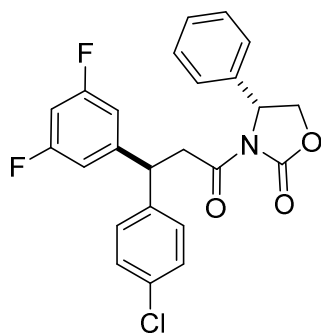

**(R)-3-((S)-3-(4-chlorophenyl)-3-(3,5-difluorophenyl)propanoyl)-4-phenyloxazolidin-2-one (34)**

A 1M solution of (4-Chlorophenyl)magnesium bromide in THF (76 ml, 76 mmol) was added to CuBr.SMe<sub>2</sub> (15.6 g, 76 mmol) in THF (100 ml) at -40 °C. A solution of (R,E)-3-(3-(3,5-difluorophenyl)acryloyl)-4-phenyloxazolidin-2-one (32) (10.0 g, 30.4 mmol) in THF (100 ml) was added dropwise and the resulting reaction stirred at -40 °C for 1.5 h, then allowed to warm slowly to ambient temperature. The reaction was quenched with 20% aq. NH<sub>4</sub>Cl, and the crude product was extracted with EtOAc (x3). The combined organic fractions washed with water and brine, dried over MgSO<sub>4</sub>, and concentrated *in vacuo*. Purification on silica gel, eluting with a gradient of 0 to 50 % A to B (A = 1:1 hexanes:CHCl<sub>3</sub>, B = EtOAc) afforded the title compound (13.6 g, 100 %) as a solid. <sup>1</sup>H NMR (399 MHz, Chloroform-d) δ 7.35 - 7.16 (m, 5H), 7.18 - 7.04 (m, 4H), 6.79 - 6.69 (m, 2H), 6.63 (tt, J = 2.3, 8.9 Hz, 1H), 5.36 (dd, J = 3.9, 8.7 Hz, 1H), 4.67 (t, J = 8.8 Hz, 1H), 4.53 (t, J = 7.7 Hz, 1H), 4.25 (dd, J = 3.9, 8.9 Hz, 1H), 3.80 (dd, J = 7.4, 16.9 Hz, 1H), 3.58 (dd, J = 8.1, 16.9 Hz, 1H); MS (ESI): *m/z* = 442.4 (MH<sup>+</sup>), 88% pure by LCMS.

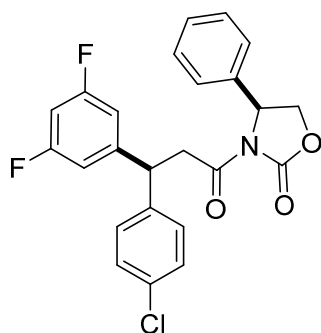

**(S)-3-((S)-3-(4-chlorophenyl)-3-(3,5-difluorophenyl)propanoyl)-4-phenyloxazolidin-2-one (36)**

A solution of aq. 35 % H<sub>2</sub>O<sub>2</sub> (5.15 ml, 58.8 mmol) then solid LiOH (705 mg, 29.4 mmol) were added to a solution of (R)-3-((S)-3-(4-chlorophenyl)-3-(3,5-difluorophenyl)propanoyl)-4-phenyloxazolidin-2-one (**34**) (6.50 g, 14.7 mmol) in THF:H<sub>2</sub>O 3:1 (120 ml) at 0 °C. The reaction was stirred at this temperature for 30 min. A solution of Na<sub>2</sub>SO<sub>3</sub> (7.42 g, 58.8 mmol) in H<sub>2</sub>O was added followed by 0.5M NaHCO<sub>3</sub> (147 ml, 73.6 mmol) and the resulting reaction stirred for 5min. The THF was removed *in vacuo* and the residue diluted with water and washed with CH<sub>2</sub>Cl<sub>2</sub> (x3). The aqueous layer was acidified with 6M HCl and the crude product was extracted with EtOAc (x3). The combined organic fractions were dried over MgSO<sub>4</sub>, and concentrated *in vacuo* to afford (S)-3-(4-chlorophenyl)-3-(3,5-difluorophenyl)propanoic acid as a solid. The crude acid was dissolved in CH<sub>2</sub>Cl<sub>2</sub> (50 ml) and SO<sub>2</sub>Cl<sub>2</sub> (2.88 ml, 39.4 mmol) was added. The resulting reaction was heated at reflux for 4 h. The solvent was removed *in vacuo* to afford (S)-3-(4-chlorophenyl)-3-(3,5-difluorophenyl)propanoyl chloride as an oil, used crude in the following reaction. A 2.5M solution of <sup>n</sup>BuLi in hexanes (5.25 ml, 13.1 mmol) was added dropwise to a solution of (S)-4-phenyloxazolidin-2-one (2.14 g, 13.1 mmol) in THF (90 ml) at -10 °C and the resulting solution stirred at this temperature for 10 min. The crude acid chloride isolated above was dissolved in THF (60 ml) and added dropwise and the resulting reaction stirred at 0°C for 30 min. The reaction was quenched with 20% aq. NH<sub>4</sub>Cl, and the crude product was extracted with EtOAc (x3). The combined organic fractions washed with water, sat. aq. NaHCO<sub>3</sub> and brine, dried over MgSO<sub>4</sub>, and concentrated *in vacuo*. Purification on silica gel, eluting with a gradient of 0 to 50 % A to B (A = 1:1 hexanes:CHCl<sub>3</sub>, B = EtOAc) afforded the title compound (4.7 g, 81 %) as a solid. <sup>1</sup>H NMR (399 MHz, Chloroform-d) δ 7.34 – 7.28 (m, 3H), 7.26 – 7.18 (m, 2H), 7.18 – 7.05 (m, 4H), 6.77 – 6.64 (m, 2H), 6.60 (tt, J = 2.3, 8.8 Hz, 1H), 5.34 (dd, J = 3.9, 8.7 Hz, 1H), 4.65 (t, J = 8.9 Hz, 1H), 4.55 (t, J = 7.6 Hz, 1H), 4.26 (dd, J = 4.0, 8.9 Hz, 1H), 3.87 – 3.49 (m, 2H).

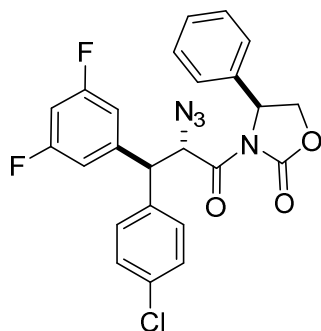

**(S)-3-((2S,3S)-2-azido-3-(4-chlorophenyl)-3-(3,5-difluorophenyl)propanoyl)-4-phenyloxazolidin-2-one (38)**

A solution of (S)-3-((S)-3-(4-chlorophenyl)-3-(3,5-difluorophenyl)propanoyl)-4-phenyloxazolidin-2-one (**36**) (4.70 g, 10.6 mmol) in THF (30 ml) was added dropwise to a 1M solution of NaHMDS in THF (11.7 ml, 11.7 mmol) at -78 °C. The resulting reaction was stirred at this temperature for 30 min. Solid trisylazide (4.28 g, 13.8 mmol) was added in one portion and the reaction stirred for 2 min, then acetic acid (3.65 ml, 63.8 mmol) and tetramethylammonium acetate (5.67 g, 42.5 mmol) were added. The cooling bath was removed and the reaction stirred at ambient temperature for 4 h. The reaction was quenched with brine and the crude product was extracted with EtOAc (x3). The combined organic fractions washed with water, sat. aq. NaHCO<sub>3</sub> and brine, dried over MgSO<sub>4</sub>, and concentrated *in vacuo*. Purification on silica gel, eluting with a gradient of 0 to 40 % EtOAc in hexanes, afforded the title compound (3.23 g, 63 %) as a white solid. <sup>1</sup>H NMR (399 MHz, Chloroform-d) δ 7.44 – 7.33 (m, 3H), 7.32 – 7.27 (m, 2H), 7.27 – 7.25 (m, 1H), 7.25 – 7.23 (m, 1H), 7.23 – 7.17 (m, 2H), 6.95 – 6.85 (m, 2H), 6.73 (tt, J = 2.2, 8.8 Hz, 1H), 5.98 (d, J = 11.1 Hz, 1H), 5.13 (dd, J = 3.8, 8.6 Hz, 1H), 4.50 – 4.36 (m, 2H), 4.23 (dd, J = 3.8, 9.0 Hz, 1H); MS (ESI): *poor ionization*, 95% pure by LCMS.

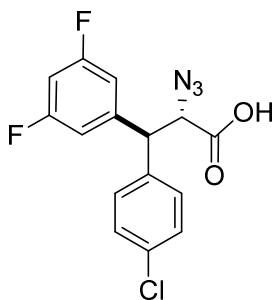

**(2S,3S)-2-azido-3-(4-chlorophenyl)-3-(3,5-difluorophenyl)propanoic acid (40)**

A solution of aq. 35 % H<sub>2</sub>O<sub>2</sub> (2.34 ml, 26.8 mmol) then solid LiOH (320 mg, 13.4 mmol) were added to a solution of (S)-3-((2S,3S)-2-azido-3-(4-chlorophenyl)-3-(3,5-difluorophenyl)propanoyl)-4-phenyloxazolidin-2-one (**38**)

(3.23 g, 6.69 mmol) in THF:H<sub>2</sub>O 3:1 (60 ml) at 0 °C. The reaction was stirred at this temperature for 30 min. A solution of Na<sub>2</sub>SO<sub>3</sub> (3.37 g, 26.8 mmol) in H<sub>2</sub>O was added followed by 0.5 M NaHCO<sub>3</sub> (66.5 ml, 33.2 mmol) and the resulting reaction stirred for 5min. The THF was removed *in vacuo* and the residue diluted with water and washed with CH<sub>2</sub>Cl<sub>2</sub> (x3). The aqueous layer was acidified with 6M HCl and the crude product was extracted with EtOAc (x3). The combined organic fractions were dried over MgSO<sub>4</sub>, and concentrated *in vacuo* to afford the title compound (2.26 g, 100 %) as a white solid. <sup>1</sup>H NMR (399 MHz, Chloroform-d) δ 7.33 – 7.29 (m, 2H), 7.22 – 7.17 (m, 2H), 6.90 – 6.82 (m, 2H), 6.73 (tt, J = 2.3, 8.8 Hz, 1H), 4.53 – 4.45 (m, 2H).

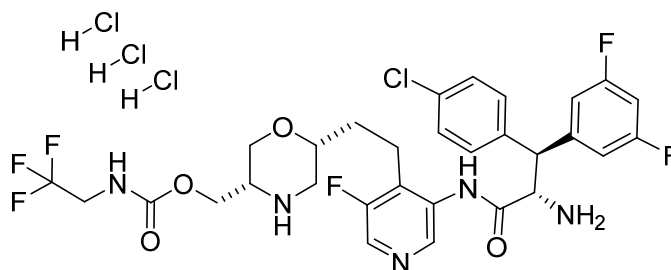

**((3S,6R)-6-(2-(3-((2S,3S)-2-Amino-3-(4-chlorophenyl)-3-(3,5-difluorophenyl)propanamido)-5-fluoropyridin-4-yl)ethyl)morpholin-3-yl)methyl (2,2,2-trifluoroethyl)carbamate trihydrochloride (9t - MK-8718)**

POCl<sub>3</sub> (35 μl, 0.375 mmol) was added dropwise to a solution of (2S,3S)-2-azido-3-(4-chlorophenyl)-3-(3,5-difluorophenyl)propanoic acid (**40**) (105 mg, 0.312 mmol) and tert-butyl (2R,5S)-2-(2-(3-amino-5-fluoropyridin-4-yl)ethyl)-5-(((2,2,2-trifluoroethyl)carbamoyl)oxy)methyl)morpholine-4-carboxylate (**25**) (150 mg, 0.312 mmol) in pyridine (0.5 ml) at -10 °C and the reaction stirred for 30 min while allowing to warm to 0 °C. The reaction was quenched with sat. aq. NaHCO<sub>3</sub> and the crude product was extracted with CH<sub>2</sub>Cl<sub>2</sub> (x3). The combined organic fractions washed with brine, dried over Na<sub>2</sub>SO<sub>4</sub>, and concentrated *in vacuo*. Purification on silica gel, eluting with a gradient of 0 to 70 % EtOAc in hexanes, afforded 150 mg of tert-butyl (2R,5S)-2-(2-(3-((2S,3S)-2-azido-3-(4-chlorophenyl)-3-(3,5-difluorophenyl)propanamido)-5-fluoropyridin-4-yl)ethyl)-5-(((2,2,2-trifluoroethyl)carbamoyl)oxy)methyl)morpholine-4-carboxylate. This compound (150 mg, 0.187 mmol) and PPh<sub>3</sub> (73.8 mg, 0.281 mmol) were heated at reflux in 4:1 THF:H<sub>2</sub>O (5 ml) overnight. The solvent was removed *in vacuo* and purification on silica gel, eluting with a gradient of 0 to 10 % MeOH in CHCl<sub>3</sub>, afforded 136 mg of tert-butyl (2R,5S)-2-(2-(3-((2S,3S)-2-amino-3-(4-chlorophenyl)-3-(3,5-difluorophenyl)propanamido)-5-fluoropyridin-4-yl)ethyl)-5-(((2,2,2-trifluoroethyl)carbamoyl)oxy)methyl)morpholine-4-carboxylate. This material was dissolved

4M HCl in dioxane (1 ml) and stirred for 1 hour. The solvent was removed *in vacuo* to afford the title compound (59 mg, 55 %) as a white solid. <sup>1</sup>H NMR (600 MHz, DMSO-d<sub>6</sub>) δ 8.27 (s, 1H), 8.08 (s, 1H), 7.92 – 7.86 (m, 1H), 7.41 (d, J = 8.4 Hz, 2H), 7.33 (d, J = 8.4 Hz, 2H), 7.10 (d, J = 6.9 Hz, 2H), 7.05 (t, J = 9.3 Hz, 1H), 4.31 (d, J = 9.6 Hz, 1H), 4.26 (d, J = 9.6 Hz, 1H), 4.20 – 4.10 (m, 1H), 4.09 – 4.00 (m, 1H), 3.82 – 3.70 (m, 2H), 3.65 (d, J = 11.8 Hz, 1H), 3.52 (d, J = 8.8 Hz, 1H), 3.22 – 3.16 (m, 1H), 2.81 – 2.76 (m, 1H), 2.61 – 2.49 (m, 4H), 2.41 – 2.32 (m, 1H), 1.61 – 1.51 (m, 1H), 1.41 – 1.31 (m, 1H); <sup>13</sup>C NMR (126 MHz, DMSO-d<sub>6</sub>) δ 174.3, 164.2 (d, J<sub>C-F</sub> = 14 Hz), 162.2 (d, J<sub>C-F</sub> = 13 Hz), 159.8, 157.6 (d, J<sub>C-F</sub> = 53 Hz), 147.4 (t, J<sub>C-F</sub> = 9 Hz), 143.8, 141.3, 135.7 (d, J<sub>C-F</sub> = 24 Hz), 134.5 (d, J<sub>C-F</sub> = 3 Hz), 133.1 (d, J<sub>C-F</sub> = 14 Hz), 132.4, 131.0, 125.7 (q, J<sub>C-F</sub> = 279 Hz), 112.9 – 112.6 (m), 102.8 (t, J<sub>C-F</sub> = 26 Hz), 75.9, 77.0, 63.8, 59.2, 54.9, 50.9, 46.2, 42.7 (q, J<sub>C-F</sub> = 33 Hz), 31.7, 20.4; Optical rotation: [α]<sub>D</sub><sup>25</sup> + 37.2 (c 1.12, MeOH); HRMS: Calcd for C<sub>30</sub>H<sub>32</sub>ClF<sub>6</sub>N<sub>5</sub>O<sub>4</sub> (MH)<sup>+</sup> 674.1963, found 674.1950; 97% pure by LCMS.

**Enzyme bound conformation of MK-8718 extracted from crystal structure of MK-8718 bound to HIV Protease**

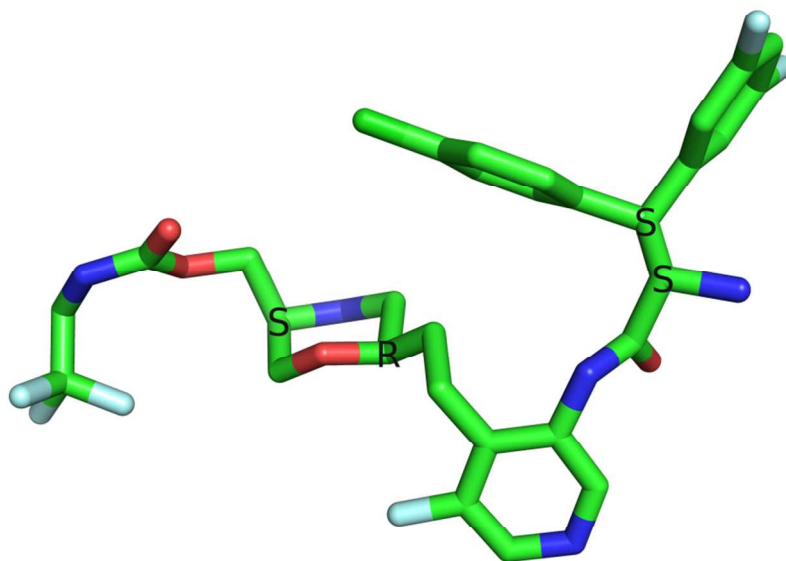

Supplement: ml6b00135_si_001.pdf [file ml6b00135_si_001.pdf]
